# Supplementary material
Source: PubMed Central journal article supplement (PMC4121785)
Supplement: 1411859111_pnas.201411859SI.pdf [file 1411859111_pnas.201411859SI.pdf]

# Supporting Information

Sang et al. 10.1073/pnas.1411859111

## SI Materials and Methods

**Plant Materials and Growth Conditions.** Rice (*Oryza sativa* L.) plants were grown in paddy fields in Beijing in summer or in Hainan province in winter. The *la1*, *soll*, and *sols la1* mutants are in the *ZH11* background, *d14* is in the *Shiokari* background, and *d27* is in the *Nipponbare* background, all of which are *japonica* subspecies. Seedlings were grown on 0.4% agar plates at 28 °C under a 16-h light/8-h dark cycle.

*Arabidopsis* seedlings were grown in soil or on 1/2 Murashiga and Skoog (MS) medium plates containing 1% sucrose and 0.8% agar at 22 °C under a 16-h light/8-h dark cycle. All *Arabidopsis* mutants used in this study are in the Columbia (Col-0) background. The *Atla1* (GABI\_591A12) mutant was obtained from the *Arabidopsis* Biological Resource Center. The transfer DNA (T-DNA) insertion sites were verified by PCR and sequencing (Fig. S7), indicating that the genotype is identical to a previously reported allele (1). The *max2* and *max4* mutants were provided by Ottoline Leyser (University of Cambridge, Cambridge, UK) (2). *Atla1 max2* and *Atla1 max4* double mutants were generated from the genetic crosses of *Atla1* × *max2* and *Atla1* × *max4*, and homozygous lines were confirmed by PCR genotyping and/or sequencing. Primers used for identifying T-DNA insertion sites and genotypes of double mutants are given in Table S1.

**Map-Based Cloning of Suppressors of LA1.** To isolate suppressors of *LA1* (SOLs), we carried out map-based cloning. The *sol* mutants were crossed to *la1* in the background of *ZF802*, an *indica* variety. The InDel and cleaved amplified polymorphic sequences markers were generated based on nucleotide polymorphisms between the genome sequences of *Nipponbare* and 93-11, an *indica* variety. The *SOL1* locus was placed within an 80-kb region between M8 and M10 on chromosome 6 by using 220 F<sub>2</sub> plants showing a compact plant type. The molecular lesions of *soll-1* and *soll-2* were identified by PCR amplification of the LOC\_Os06g06050 (*D3*) genomic region from *la1* and *soll-1* and *soll-2* mutant plants and sequence comparison using DNASTAR. The primer sequences used for mapping are listed in Table S1.

**Assay of Shoot Response to Gravity.** The gravitropic assay was carried out as described previously (3). For rice shoot gravitropism, 3- or 4-d-old light-grown seedlings were grown on 0.4% agar containing different concentrations of GR24 as indicated and then were transferred to darkness and reoriented by 90° for a series of time periods at 28 °C. To examine gene expression upon gravity stimulation by qRT-PCR analyses, 7-d-old light-grown seedlings were reoriented by 90° for 6 h, and then 1.5 cm of the basal shoot was dissected into lower and upper sides. For

*Arabidopsis* shoot gravitropism, 4-d-old etiolated seedlings were grown on 1/2 MS medium with or without 2.5 μM GR24 and then were reoriented by 90° for up to 24 h, or 1-mo-old inflorescence stems were transferred to darkness with 24 h gravistimulation.

**Generating D3RNAi Transgenic Lines.** To construct the *D3*RNAi plasmid, two 350-bp DNA fragments were amplified from the *D3* cDNA using two pairs of primers, *D3*RNAi-F1 and *D3*RNAi-R1 and *D3*RNAi-F2 and *D3*RNAi-R2 (Table S1) and were cloned into the binary vector 1460. This recombinant plasmid then was introduced into *Agrobacterium tumefaciens* EHA105, and the *la1* mutant was transformed as previously reported (4). The phenotypes were scored in the homozygous T<sub>3</sub> progeny.

**Quantitative RT-PCR Analysis.** Total RNA was extracted using a TRIzol RNA extraction kit (Invitrogen). One microgram of total RNA was treated with DNase I and used to synthesize cDNA with an Avian Myeloblastosis Virus Reverse Transcriptase (Promega). Quantitative RT-PCR (qRT-PCR) experiments were performed using the SsoFast EvaGreen Supermix kit (Bio-Rad) on the CFX96 real-time system (Bio-Rad) following the manufacturer's instructions. The expression levels were normalized to the expression of a rice ubiquitin gene. The gene-specific primers are listed in Table S1.

**Measurement of Free Indoleacetic Acid Content.** Indoleacetic acid (IAA) extraction and measurement were performed as previously described (5) with minor modifications. Briefly, 7-d-old seedlings were reoriented by 90° for 12 h. After gravistimulation, 150-mg shoot tissues from the lower and upper sides of the 1.5-cm shoot base were collected for analysis. After extraction and purification, the samples were subjected to LC/MS-MS analysis using a system consisting of an Acquity Ultra Performance Liquid Chromatograph (Acquity UPLC; Waters) and a triple quadrupole tandem mass spectrometer (Quattro Premier XE; Waters).

**Lateral Auxin Transport Assay.** Lateral auxin transport was assayed as previously described with minor modifications (3). Briefly, 5-d-old dark-grown coleoptiles (1 cm) were harvested and deprived of endogenous IAA. The apical ends of coleoptiles were inserted horizontally into agar blocks that contain 100 nM <sup>3</sup>H-IAA. After transport in darkness at 28 °C for 2.5 h, sections of the 0.5-cm segments from the apex were split evenly into upper and lower halves. After incubation in 2 mL scintillation liquid overnight, the radioactivity of each half was counted by a liquid scintillation counter (1450 MicroBeta TriLux; Perkin-Elmer).

1. Yoshihara T, Spalding EP, Iino M (2013) AtLAZY1 is a signaling component required for gravitropism of the *Arabidopsis thaliana* inflorescence. *Plant J* 74(2):267–279.
2. Stirnberg P, Furner IJ, Ottoline Leyser HM (2007) MAX2 participates in an SCF complex which acts locally at the node to suppress shoot branching. *Plant J* 50(1):80–94.
3. Li P, et al. (2007) LAZY1 controls rice shoot gravitropism through regulating polar auxin transport. *Cell Res* 17(5):402–410.

4. Hiei Y, Ohta S, Komari T, Kumashiro T (1994) Efficient transformation of rice (*Oryza sativa* L.) mediated by *Agrobacterium* and sequence analysis of the boundaries of the T-DNA. *Plant J* 6(2):271–282.
5. Fu J, Chu J, Sun X, Wang J, Yan C (2012) Simple, rapid, and simultaneous assay of multiple carboxyl containing phytohormones in wounded tomatoes by UPLC-MS/MS using single SPE purification and isotope dilution. *Anal Sci* 28(11):1081–1087.



D3 MAEEVEEGRSSSSAILLPEPILHLHLSFLTDVRSRHRRAAAGRMRAAERATFSELSLNGDPSPGFLFSHAFFP 80  
 MAX2 MAS-----TTISLDPDVILSGLSSIVSDSRARNSLSLVSHKFLALERSTRSHLT RGNAR--DLSLVDFCFRS- 66  
 RMS 4 MYD-----TVAHLPEELSQVFAALTDTRTRNSLSLVGRSFFLEPKTRVSLTL RGNAR--DLYRIPTFAH- 66  
 PhMAX2A MA-----TQINDLPDVILSNTHAAVSDTRSRNSLSEVCRKMLVLERSTRVSLTL RGNVR--DLFMLPTCFRS- 65  
 PhMAX2B MAKTPT----IPFTLNDLPDVILSNTHAAVSDTRSRNSLSEVCRKMLVLERSTRVSLTL RGNIR--DLFMLPTCFRS- 71

---

D3 ALEHLDLSLWSPWGHPLLSVPPCGGGGGGAPSSASSSGMNVVHPAISEQNAFTARLAGCFPAVTSINVVYCRDPTTIA 160  
 MAX2 -LSHLDLSELSFWGHPLLSLSP-----IDH---NQDARLRKFCFFVEVSLNVVTRSPSSSE 119  
 RMS 4 -VFNLDVLSLWSPWGHPLLSGSPA-----TAD---SPSLAQRLRNAFFRVTSILVYVTRDEPTLH 119  
 PhMAX2A -ITHLDLSLWSPWGHPLLSPT-----DDP---SHLHLHHAFFVEVTSILVYVTRDEPTLQ 117  
 PhMAX2B -ITVLDLSLWSPWGHPLLSRA-----TDAPDNDNALHLRHRHTFBSVTSITLYARDPNTIQ 128

---

D3 NLTDFHMQASLRVYKLVVWHQRPPTLPCADLEPLLPTCA-ALRELDLSEFYCWTEVDVRAALTFHSATAALTHPTGLAA 239  
 MAX2 LLLDQMP-RIRIKLVRWHQRPPTLPTGQDFVEIFPFGGFLSGLDLSNFYHWTEDEFFVLRVYADVAARLRTRIDLLTAS 198  
 RMS 4 LLLHSHWPELRDVLVRWHQRPPLDQPGSDAALFSRGR-SITSLDLSFYHWTEDEFFVLAANAAATSRRLNLLT-T 197  
 PhMAX2A LLEPQMP-QLKQIKLVVWHQRP-QLATGDEENMLFENCP-NLSSLDLSTFYCWTEDEFFVLSHVMASNVVTLNLLNFC 194  
 PhMAX2B FLPAQWAHLKHIKLVVWHQRA-QLASGDELNLLFIGNP-QITSLDLSNFYCWTEDEFFPALQSNENVCNLTRENLNLS 206

---

D3 AFDGKSSSLGHTLAASCPNLRKLVAPLLENPFSDCVGDDALSLTATSCFELTVRSEPFEEAANIQR-----EBA 311  
 MAX2 FTEGKSSLEIVSIRKSCPNIKLELVACTFDPRFEEVGDLESAVATSSPKLHLHMVDTASLWNRPAIGPTEAG---DS 275  
 RMS 4 FTEGKSNHESTLSSCPNLEHLLVACTFDPRFIEVGDLEDAASNCPKLSLHMDTSSFNRRRE--EGG---EDA 272  
 PhMAX2A FEEGKFDKIKATLACPNLEFRVYCMDFPRYIGFVGDLELVAVATNCPKLSLHMDTSSFNRRRE--EGG---EDA 274  
 PhMAX2B FEEGKFDKIKATLACPNLEFRVYCMDFPRYIGFVGDLELVAVATNCPKLSLHMDTSSFNRRRE--EGG---EDA 286

---

D3 AITVAGVAFPAALPAEDFTMDLQHNVLEAAPAPAPARRCRKIKFTLGSFOGLCRASWL-HLDGVALCGGLSLSIR 390  
 MAX2 AVTAGTLEIVFSGLPNLEELVLDGKLVKHSVALBAENSKRKLKVLKLGQFQGCASATWRRLDGVALCGGLSLSIR 355  
 RMS 4 SVSRATLLELFSGLPLEELVLDVCRNVSSESAPFEMSSKCBNKKVRLGFGQGLANGS-RLDGLALCHGLSLSIR 351  
 PhMAX2A KFGVSTLIEVFSGLPLEELVLDVCRNVRDTPGALHFNKCRKLRSLKLGQFHGISMPVES-KLDGVALCGGLSLSIR 353  
 PhMAX2B QFSVSTLIEVFSGLSLEELVDFVCRNVRDTPGALHFNKCRKLRSLKLGQFHGISMPIES-KLDGVALCGGLSLSIR 365

---

D3 NCGDITDASLNAIGRGCRLAKFCITGCDLVTAGHRELAFTLRPLRETVLHCRILHTAECFAISPTDRITSEFDIN 470  
 MAX2 NSGDLTDMGLVIAIGRGCRLITFEIQGCENVTVDGHRMWSLRSKTLTDVRSCKNLDTAASLKAPEPIQDRIRKRLHD 435  
 RMS 4 CGDLDMDGLTIGRGCRLVRFPIQGCRLVTEKGRMTCLLRRLTIDVVASQVNLDAATHALEPIRDRIRKRLHD 431  
 PhMAX2A NCGDITDASLNAIGRGCRLAKFCITGCDLVTAGHRELAFTLRPLRETVLHCRILHTAECFAISPTDRITSEFDIN 470  
 PhMAX2B SVGDLTDMGLTIGRGCRLAKFCITGCDLVTAGHRELAFTLRPLRETVLHCRILHTAECFAISPTDRITSEFDIN 445

---

D3 CVWNTTQPCSVANG----TTTCCPEDDELG-----EYVESAAKRCFY-MEFDL----- 516  
 MAX2 CVWSGSDEEVEG----RVETSADHEE-----EDDYERSOKRCKYSEBEHCSTSD-----VNGFC 489  
 RMS 4 CVWK---ESDNGHSFLNFDLNASAEINSELMCEGEGE--YGETSRKRRCQCEGPEDDSFVHNSNGNSSGNDNGYS 506  
 PhMAX2A CVWDSVEEENLDGYGYGFDLNRFDGCBASSN---FGDTFGCEEAYLFKFKRCKEESYDLNSLYEVENNGH-----NGYS 506  
 PhMAX2B CVWDTVEEENLDGVEYGFDLNBSAGGEBASSNPAGEGDTFGSMDLDMNRRNRCKYSYDLNSVYVENNGH-----NGFC 521

---

D3 ---GSWEMRSLSLWESAPQLLSPLISAGLDSFPVLEETSIVKVEGDORTCPRAFPTIFGLSDLAGHPTAKMLHLLSEA 593  
 MAX2 SEDRWKLELYSLWLNVEGELTFLPMTGLDCCPNLEEIRKIEGDCRGRKRPAPPEFGLSCLALPKLSKMLDCCGDT 568  
 RMS 4 C--NSWESLHYLSLWLVGGLLTPLAAGLDDCPNLEEIRKIEGDCRGRKRPAPPEFGLSCLALPKLSKMLDCCGDT 583  
 PhMAX2A G--RSWDRLOYSLWLVGGLLTPLAAGLDDCPNLEEIRKIEGDCRGRKRPAPPEFGLSCLALPKLSKMLDCCGDT 583  
 PhMAX2B G--RWDRLOYSLWLVGGLLTPLAAGLDDCPNLEEIRKIEGDCRGRKRPAPPEFGLSCLALPKLSKMLDCCGDT 598

---

D3 VGYATAPFGQMDLSLWERFYLHGTESTLTYELDYWPPQDRDVRHRSLELPAVGLRQCVGLRKLFIHGTAHEHFMMFE 673  
 MAX2 IGYATAPFGQMDLSLWERFYLHGTESTLTYELDYWPPQDRDVRHRSLELPAVGLRQCVGLRKLFIHGTAHEHFMMFE 647  
 RMS 4 RGYVYVYAPSGQMDLSLWERFYLHGTESTLTYELDYWPPQDRDVRHRSLELPAVGLRQCVGLRKLFIHGTAHEHFMMFE 662  
 PhMAX2A IGYATAPSGQMDLSLWERFYLHGTESTLTYELDYWPPQDRDVRHRSLELPAVGLRQCVGLRKLFIHGTAHEHFMMFE 662  
 PhMAX2B IGYATAPSGQMDLSLWERFYLHGTESTLTYELDYWPPQDRDVRHRSLELPAVGLRQCVGLRKLFIHGTAHEHFMMFE 677

---

D3 LRIIPNLRDVQLREDYYPAPENDLMTMFRFSSWIRFEVQLNSRITDD 720  
 MAX2 LRIIPNLRDVQLREDYYPAPEND-MSTEMRFGSCSRFEDQLNSRITDD 693  
 RMS 4 LRIIPNLRDVQLREDYYPAPEND-MSTEMRFGSCSRFEDALNRRITDD 708  
 PhMAX2A LRIIPNLRDVQLREDYYPAPEND-MSTEMRFGSCSRFEDALNRRITDD 708  
 PhMAX2B LRIIPNLRDVQLREDYYPAPEND-MSTEMRFGSCSRFEDALNRRITDD 723

Fig. S2. Sequence alignment of rice *D3*, *Arabidopsis MAX2*, pea *RMS4*, *petunia PhMAX2A*, and *PhMAX2B*. The conserved R702 is marked by the red box. The green box indicates the F-box, and the blue lines above the sequence indicate leucine-rich repeats.









**Table S1. Primers used in this study**

| Primer name                  | Sequence (5'-3')               |
|------------------------------|--------------------------------|
| <b>Genotyping</b>            |                                |
| LA1-F                        | CAGATATTTAGAAACGGAGGGAG        |
| LA1-R                        | TACCGCAAACAATTGAACTC           |
| D14-F                        | ATGCTGCGATCGACGCATCC           |
| D14-R                        | TTAGTACCGGGCGAGAGCG            |
| D27-F                        | TGCCTGATACCTGATTAG             |
| D27-R                        | GTTGTGTTTACCCACTGA             |
| atla1-F                      | CACTCTAAGTGAGCAAGGAG           |
| atla1-R                      | GGCAAATTGAGTAGGTGAGC           |
| LB5                          | ATATTGACCATCATACTCATTGC        |
| <b>Map-based cloning</b>     |                                |
| M1F                          | AGGCTTGCTCCGTTTGTAT            |
| M1R                          | CATACAGACAGGTGGTACAGTAAAT      |
| M2F                          | TCGCCGAGGGAATACAAAT            |
| M2R                          | GCACGGAGAACCAAGCGGGAAC         |
| M3F                          | CAGGTGGGAGAAAGAAAGCC           |
| M3R                          | GAGGAAGAAGCCAAGGAGG            |
| M4F                          | TCTTCTCCTCCTCAATACCTG          |
| M4R                          | GGCAAGAAACACGCTAAGAT           |
| M5F                          | AAACGGAATACCAACAGGTG           |
| M5R                          | TCTGCTGCTCGCATCACG             |
| M6F                          | AAATCTTACGATATGGCACGG          |
| M6R                          | CAGTTTTCCCTTCGCCAC             |
| M7F                          | AACACGGCTGCCTGCCTGAG           |
| M7R                          | GGCGGTGGTGGTCGAGGTAA           |
| M8F                          | CACGGTGTGGATGGATCG             |
| M8R                          | CTTACCGTCAGGATGAAGAACAT        |
| M9F                          | AAATCCCTCAACGGCAGC             |
| M9R                          | CCGGCAGGTCCAGTATCG             |
| M10F                         | GGATTGGTTTTATGCCGTAA           |
| M10R                         | ATGAGGACGACGAGCAGATT           |
| M11F                         | TGCTCGCCATATCTTCCC             |
| M11R                         | TTCTTCTCCTGAGGCTCTACT          |
| <b>Transgenic constructs</b> |                                |
| D3RNAi-F1                    | AAGGATCCCCACGACCTGCTCCAAGAAC   |
| D3RNAi-R1                    | AAGGTACCCGCAAGTTTGGAAATGAAAGGA |
| D3RNAi-F2                    | AAGAGCTCCCACGACCTGCTCCAAGAAC   |
| D3RNAi-R2                    | AAACTAGTCGCAAGTTTGGAAATGAAAGGA |
| <b>qRT-PCR</b>               |                                |
| OsUBQ1-QF                    | AACCAGCTGAGGCCCAAGA            |
| OsUBQ1-QR                    | ACGATTGATTTAACCAGTCCATGA       |
| OsIAA20-QF                   | TGGCGGATATGTGAAGGTGAA          |
| OsIAA20-QR                   | TATGAGCCGAGGATGGACAAG          |
| LA1-QF                       | GCAACGCCGAGATGAACG             |
| LA1-QR                       | ATAATTCAGCACCAAGTAGTCCG        |
| D3-QF                        | CCACCATTTGCTGATTCGTTCT         |
| D3-QR                        | ATGTTCTGATGCTGATCTTGTTC        |
